# Supplementary material for: Nonsurfactant synthesis of PbS crystals via electrodeposition and hydrothermal methods: from octahedron to maya-pyramid
Source: Royal Society of Chemistry journal article supplement (doi:10.1039/b922261h), 2010-01-01
Supplement: b922261h.pdf [file b922261h.pdf]

## Supplementary Information

### **Nonsurfactant Synthesis of PbS Crystals via Electrodeposition and Hydrothermal Methods: from Octahedron to Maya-pyramid**

Fei Chen<sup>1,2</sup>, Weiming Qiu<sup>1</sup>, Xiaoqiang Chen<sup>1</sup>, Mang Wang<sup>1</sup>, Hongzheng Chen<sup>1\*</sup>

<sup>1</sup>*State Key Lab of Silicon Materials, Key Laboratory of Macromolecule Synthesis and Functionalization of Ministry of Education, & Department of Polymer Science and Engineering, Zhejiang University, Hangzhou 310027, P. R. China*

<sup>2</sup>*Laboratory of Polymer Materials and Engineering, Ningbo Institute of Technology, Zhejiang University, Ningbo 315100, P. R. China*

\* To whom correspondence should be addressed. E-mail: hzchen@zju.edu.cn.

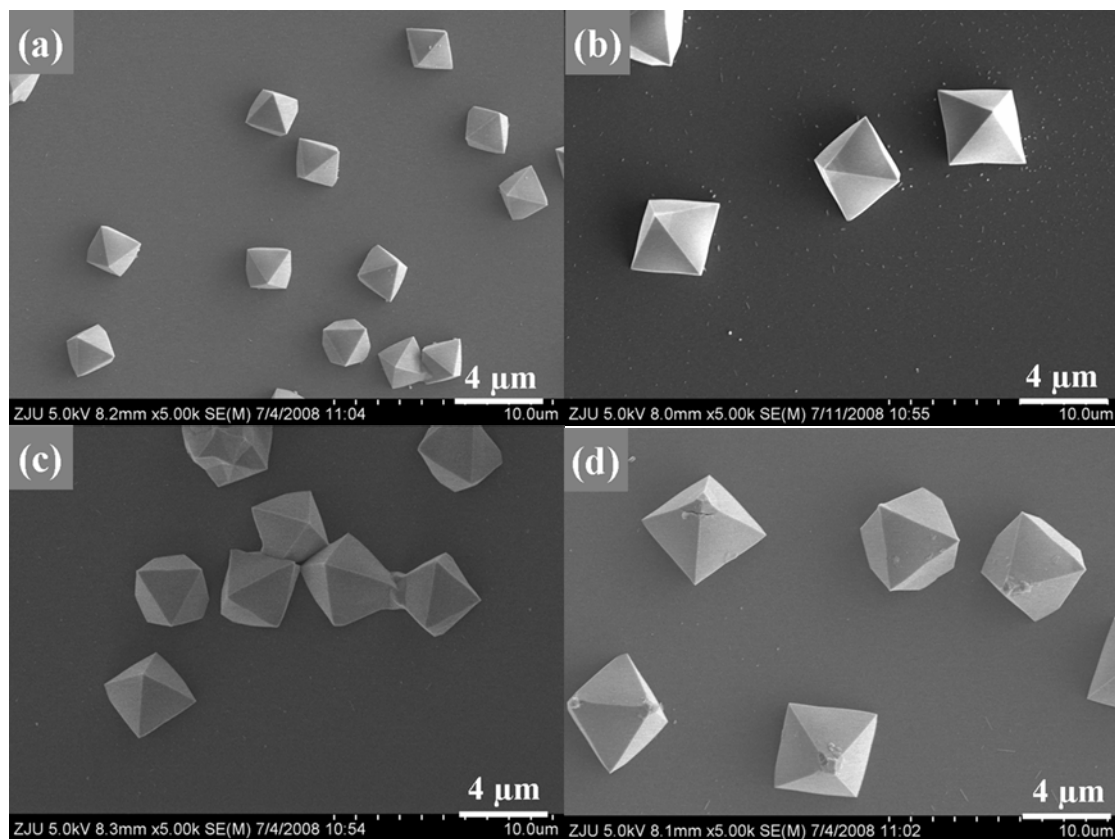

**Figure S1.** FESEM images of octahedra PbS microcrystals at different reaction times of 300s (a), 600s (b), 900s (c), and 1200s (d) while keeping other conditions constant : 0.05 M PbCl<sub>2</sub> and 0.02 M S; 0.4 mA/cm<sup>2</sup> under 110 °C.

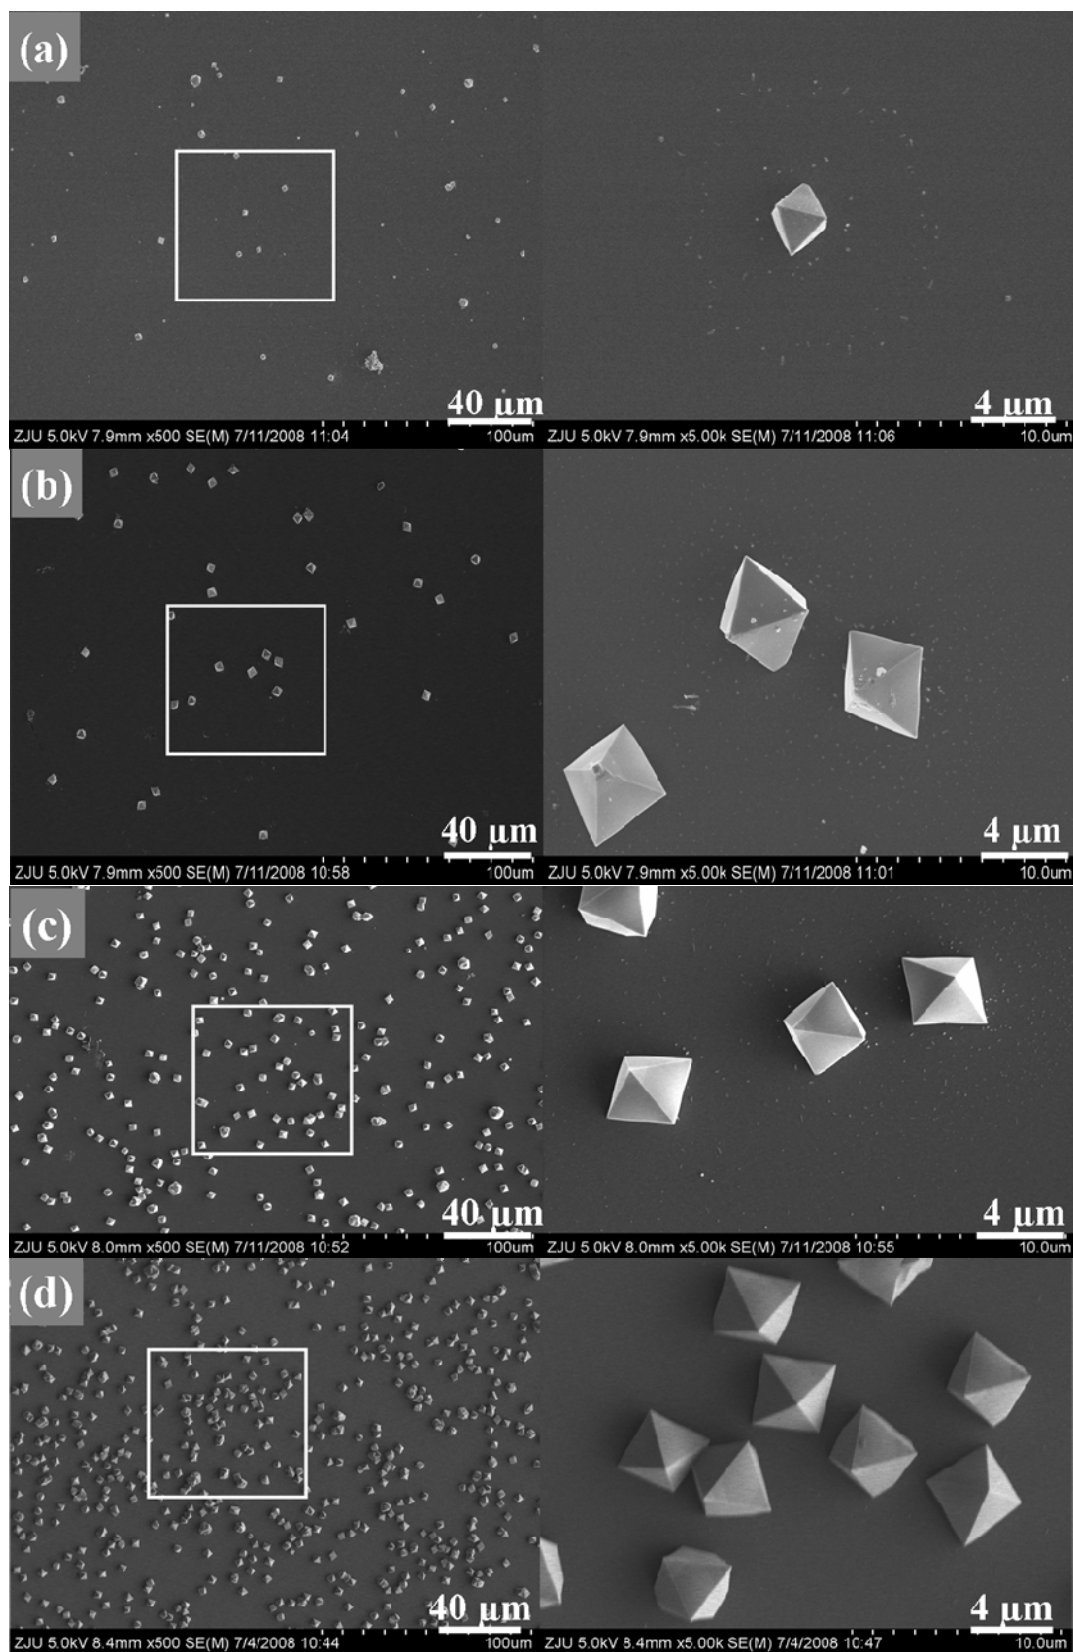

**Figure S2.** FESEM images of octahedra PbS microcrystals at different currents of

0.01 mA (a), 0.05 mA (b), 0.1 mA (c), and 0.2 mA (d). The left is the low magnitude image, and the right is the corresponding high magnitude image while keeping other conditions constant: 0.05 M PbCl<sub>2</sub> and 0.02 M S; 900 s under 110 °C.

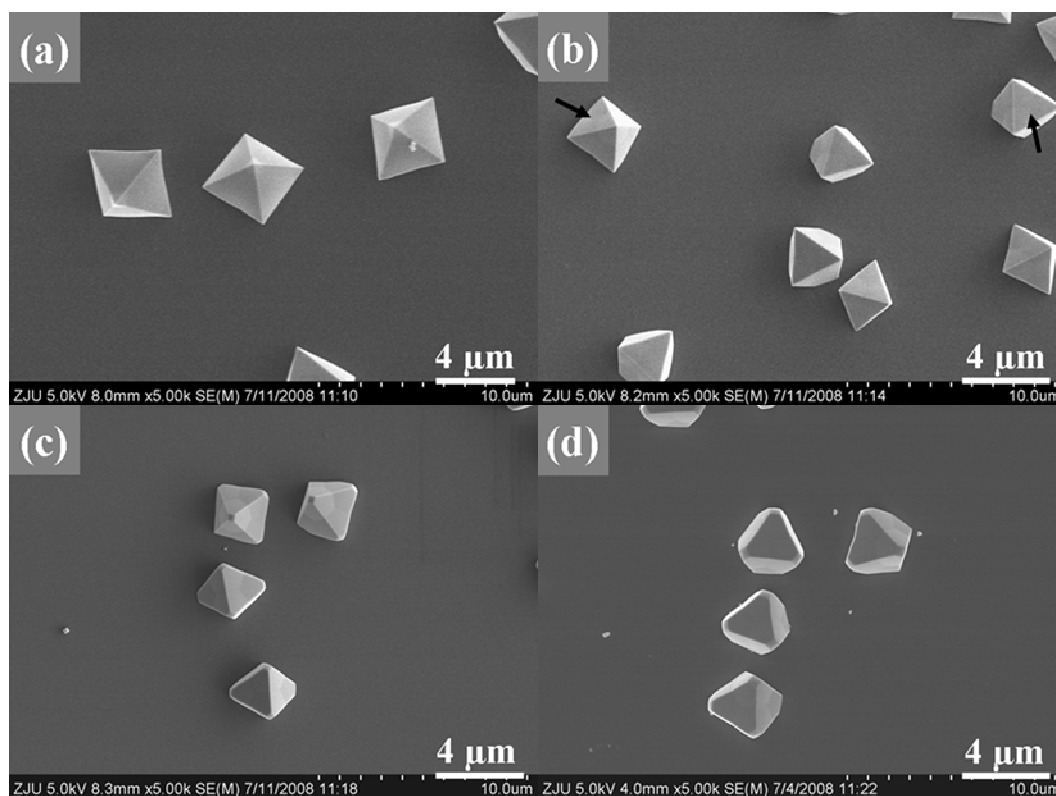

**Figure S3.** FESEM images of PbS microcrystals electrodeposited from different precursors' concentrations: (a) 0.05 M PbCl<sub>2</sub> and 0.02 M S; (b) 0.1 M PbCl<sub>2</sub> and 0.04 M S; (c) 0.15 M PbCl<sub>2</sub> and 0.06 M S; and (d) 0.2 M PbCl<sub>2</sub> and 0.08M S, while keeping other conditions constant: 0.2 mA/cm<sup>2</sup>, 900 s under 110 °C.
